# Supplementary material
Source: PubMed Central journal article supplement (PMC6398581)

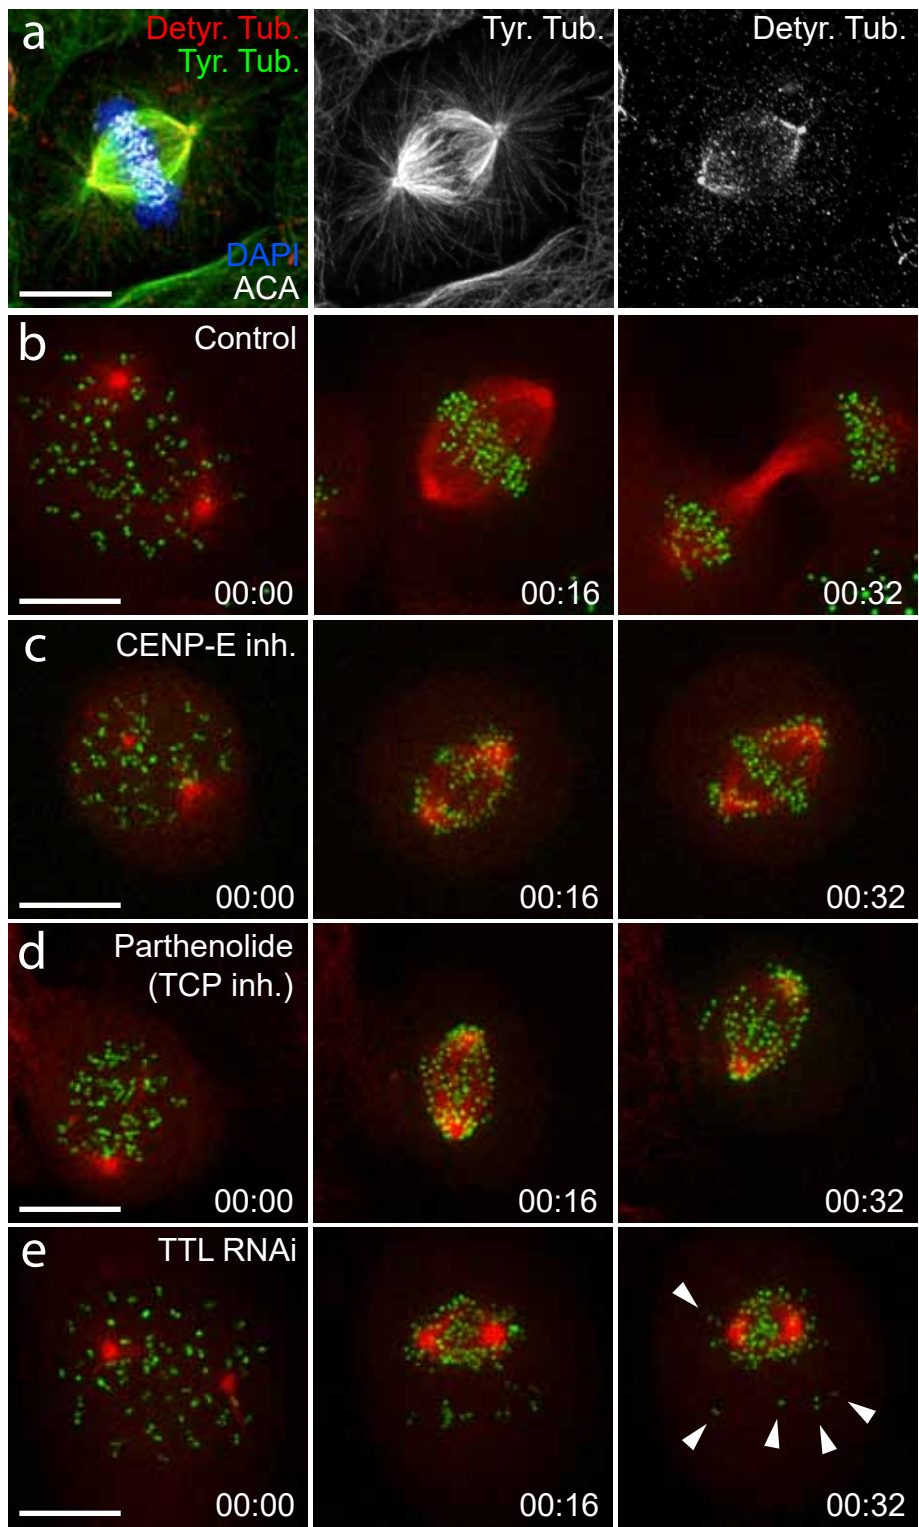

Supplement: NIHMS68992-supplement-Fig__3.pdf [file NIHMS68992-supplement-Fig__3.pdf]
